# Supplementary material for: New homopolymers and copolymers based on 5-succinyl cyclooctene and mono-substituted ethylene glycols
Source: Royal Society of Chemistry journal article supplement (doi:10.1039/d4py00351a), 2024-01-01
Supplement: d4py00351a1.pdf [file d4py00351a1.pdf]

## Electronic Supplementary Information

### New homopolymers and copolymers based on 5-succinyl cyclooctene and mono-substituted ethylene glycols

Olga A. Adzhieva,<sup>a</sup> Alexey V. Roenko,<sup>a</sup> Yulia I. Denisova,<sup>a</sup> Marina P. Filatova,<sup>a</sup> Ekaterina A. Litmanovich,<sup>b</sup> Georgiy A. Shandryuk,<sup>a</sup> Alexander V. Finko,<sup>b</sup> and Yaroslav V. Kudryavtsev\*<sup>a,c</sup>

a Topchiev Institute of Petrochemical Synthesis, Russian Academy of Sciences  
Leninsky Pros. 29, 119991 Moscow, Russia

b Department of Chemistry, Moscow State University,  
Leninskie Gory 1/3, Moscow 119991, Russia

c ESPCI Paris, PSL Research University, 10 Rue Vauquelin, Paris, 75005 France

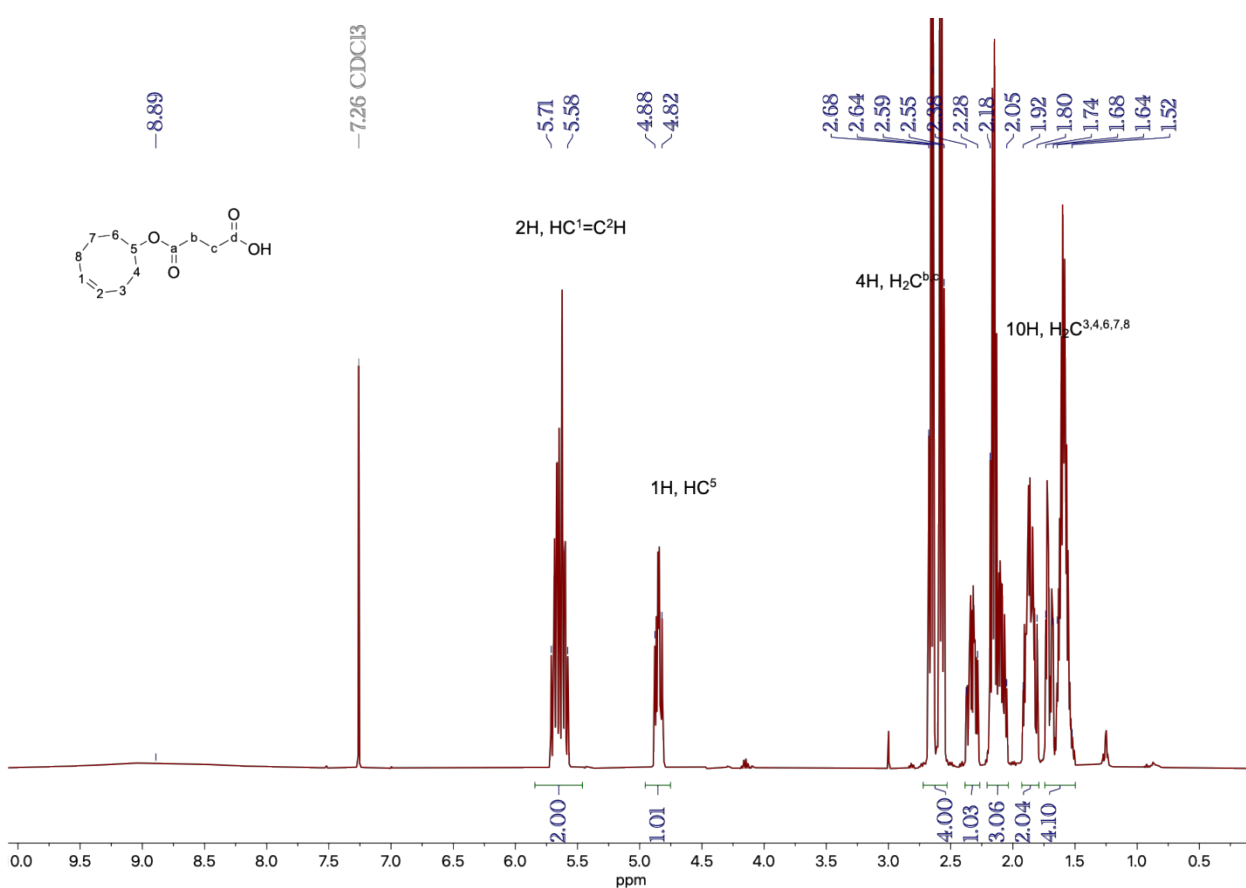

Figure S1 <sup>1</sup>H NMR spectrum of (Z)-4-(cyclooct-4-en-1-yloxy)-4-oxobutanoic acid (sCO)

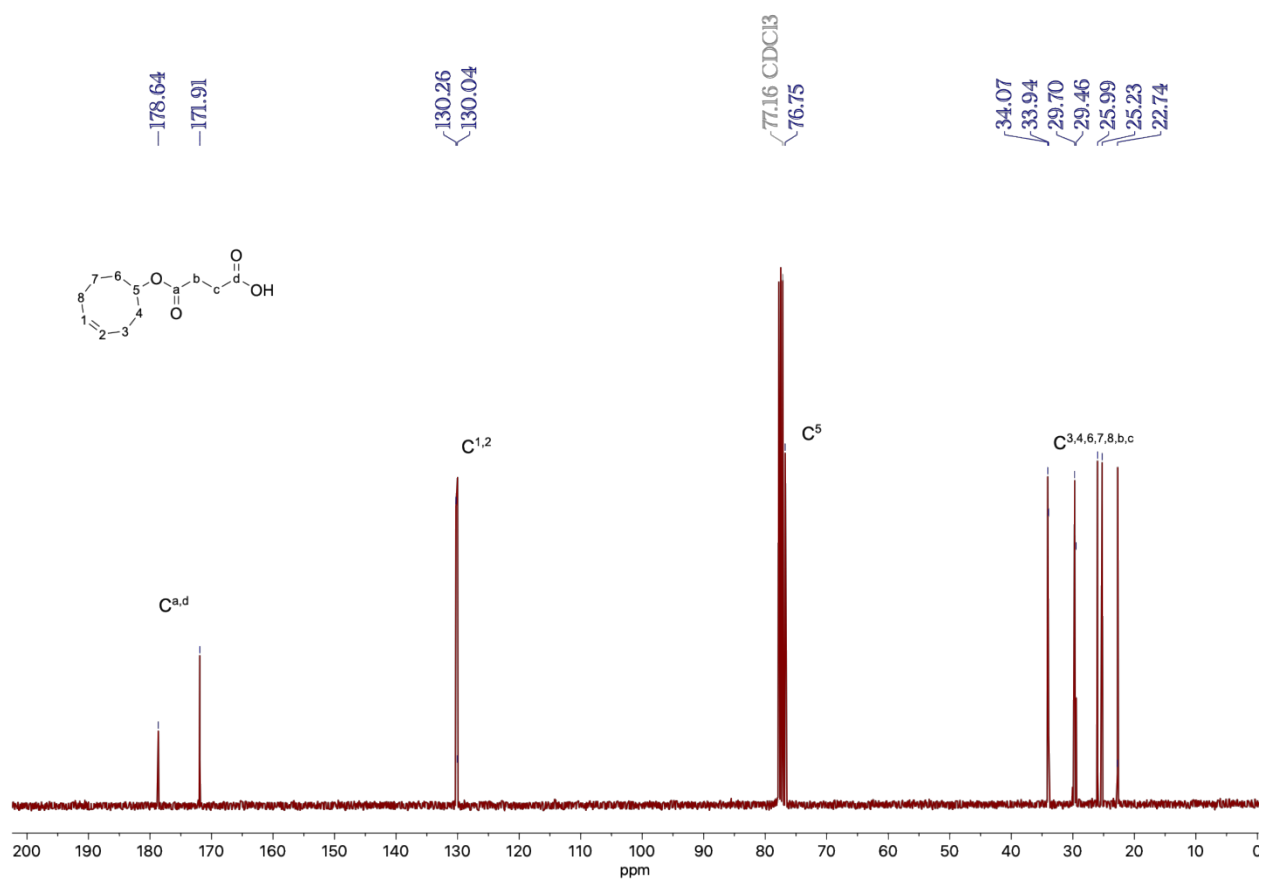

Figure S2  $^{13}\text{C}$  NMR spectrum of (Z)-4-(cyclooct-4-en-1-yloxy)-4-oxobutanoic acid (sCO)

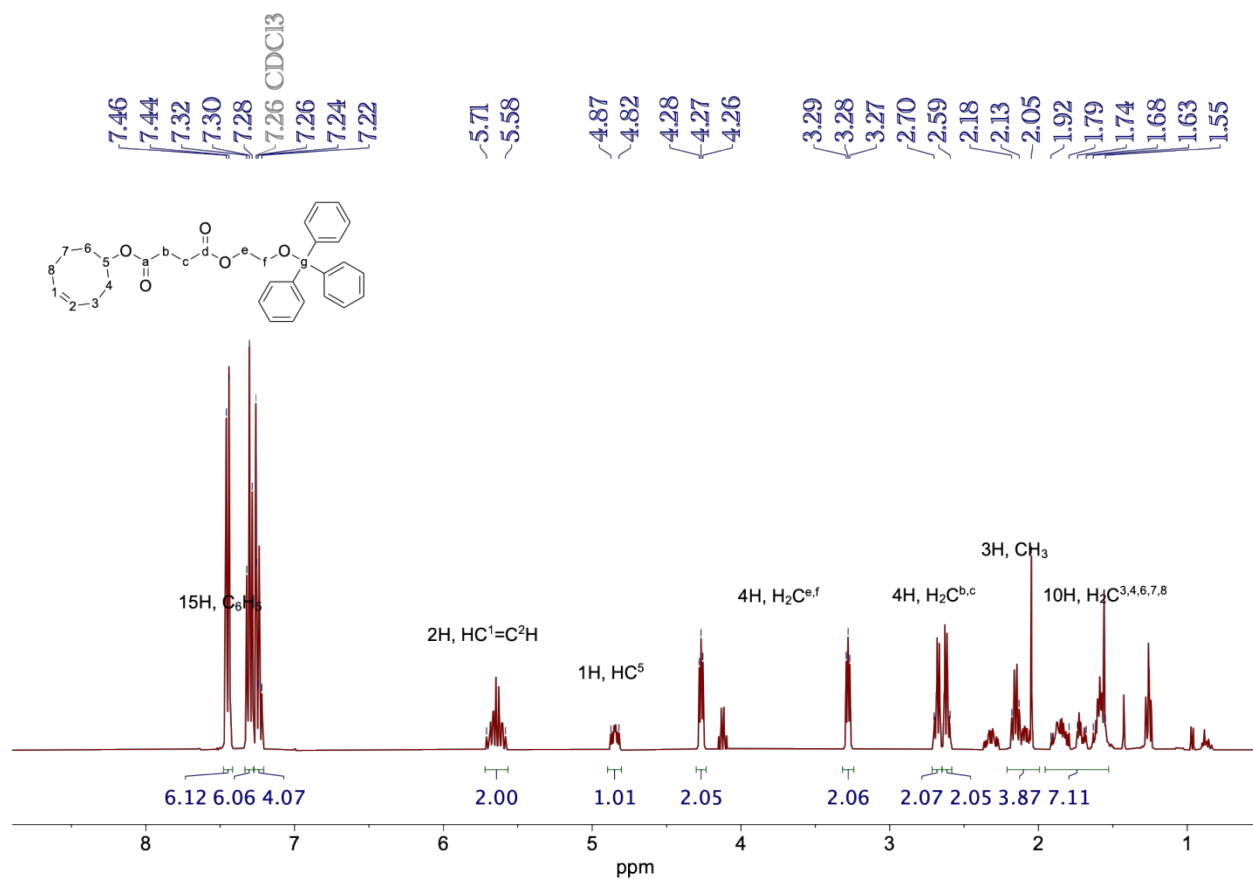

Figure S3  $^1\text{H}$  NMR spectrum of (Z)-cyclooct-4-en-1-yl (2-(trityloxy)ethyl) succinate (CO1)

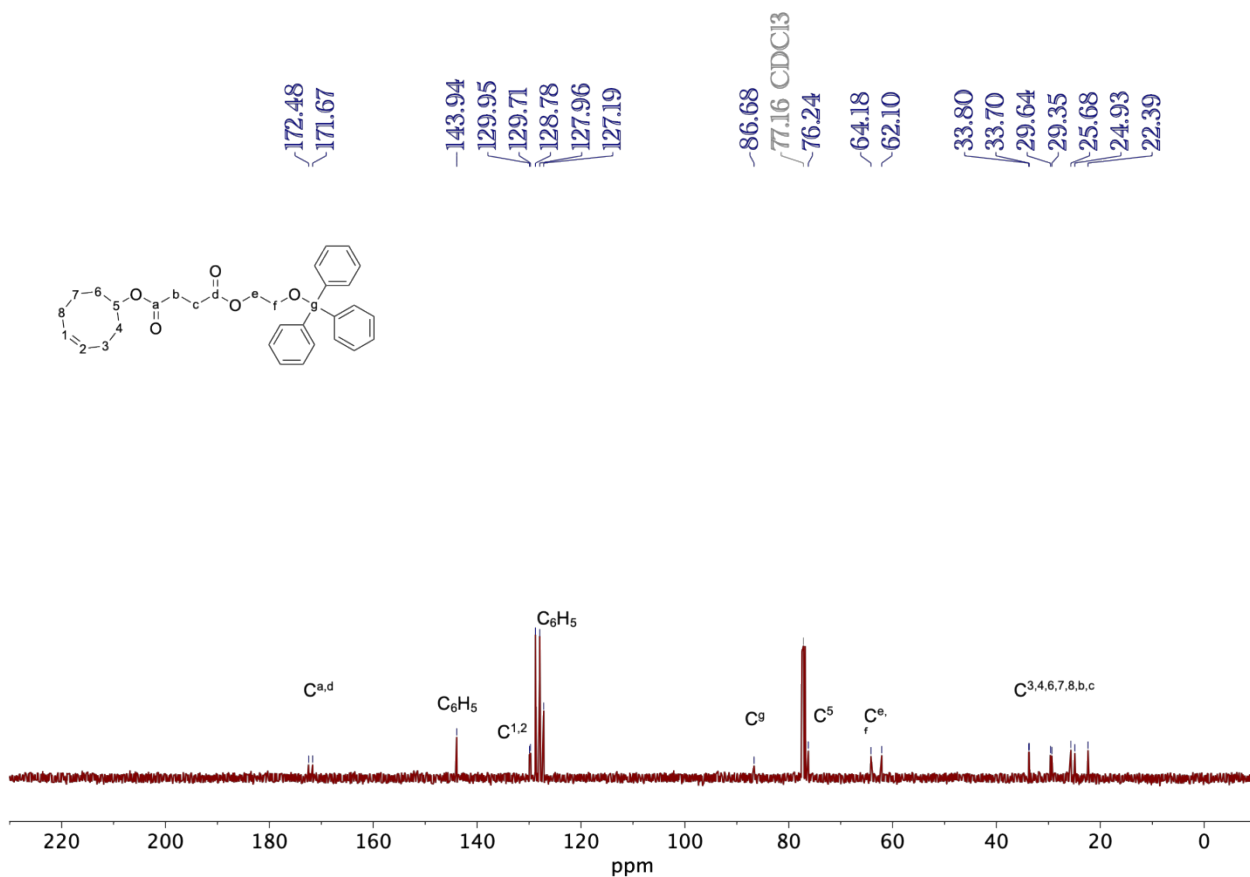

Figure S4 <sup>13</sup>C NMR spectrum of (Z)-cyclooct-4-en-1-yl (2-(trityloxy)ethyl) succinate (CO1)

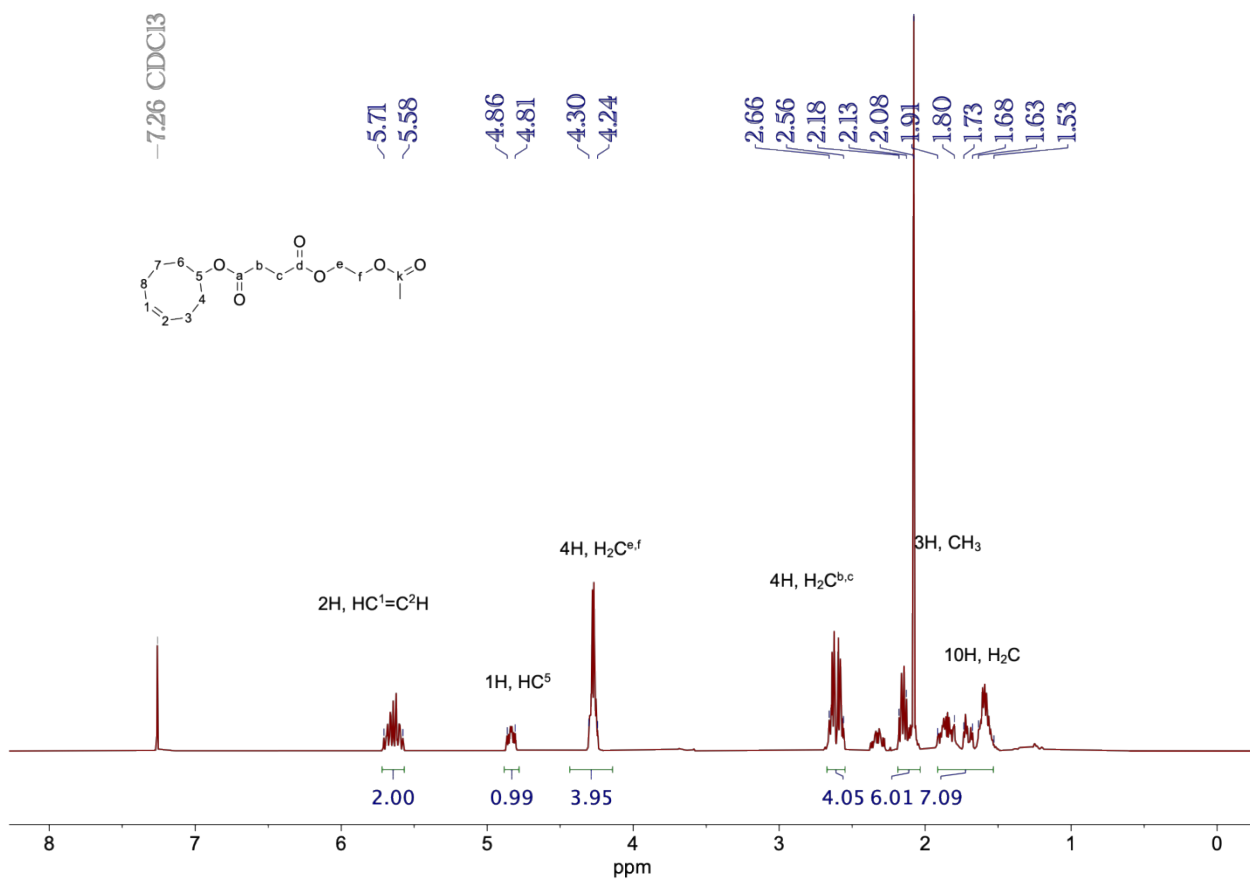

Figure S5 <sup>1</sup>H NMR spectrum of (Z)-2-acetoxyethyl cyclooct-4-en-1-yl succinate (CO2)

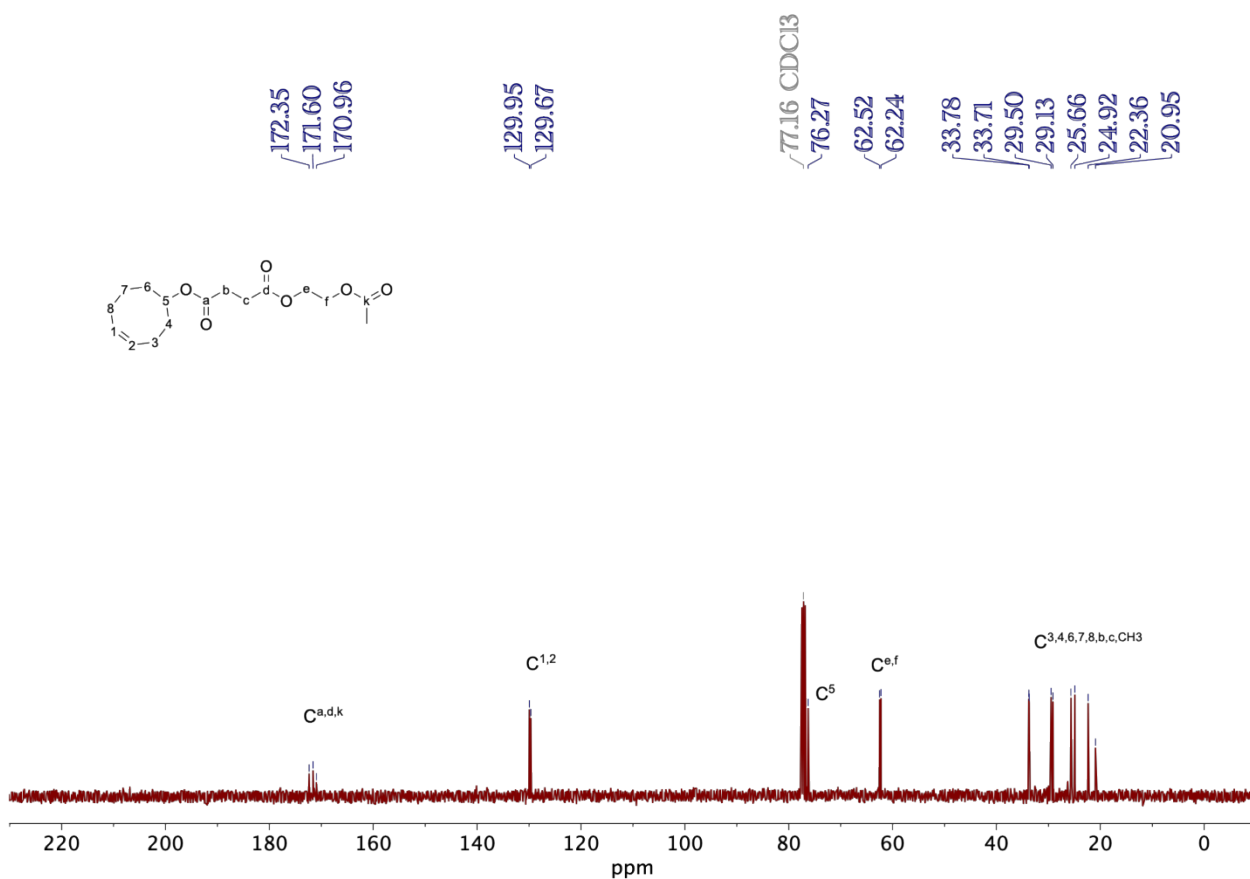

Figure S6 <sup>13</sup>C NMR spectrum of (Z)-2-acetoxyethyl cyclooct-4-en-1-yl succinate (CO2)

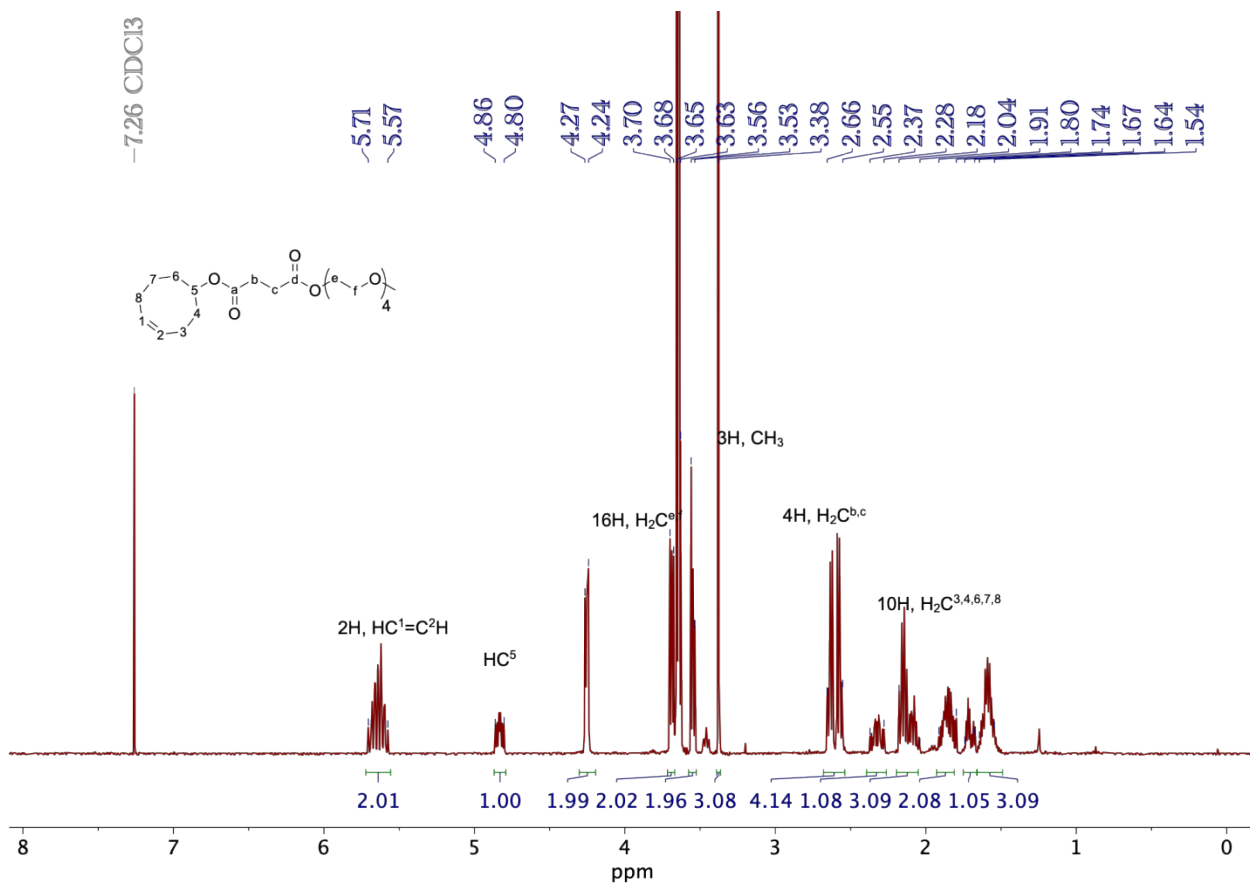

Figure S7 <sup>1</sup>H NMR spectrum of (Z)-cyclooct-4-en-1-yl (2,5,8,11-tetraoxatridecan-13-yl) succinate (CO3)

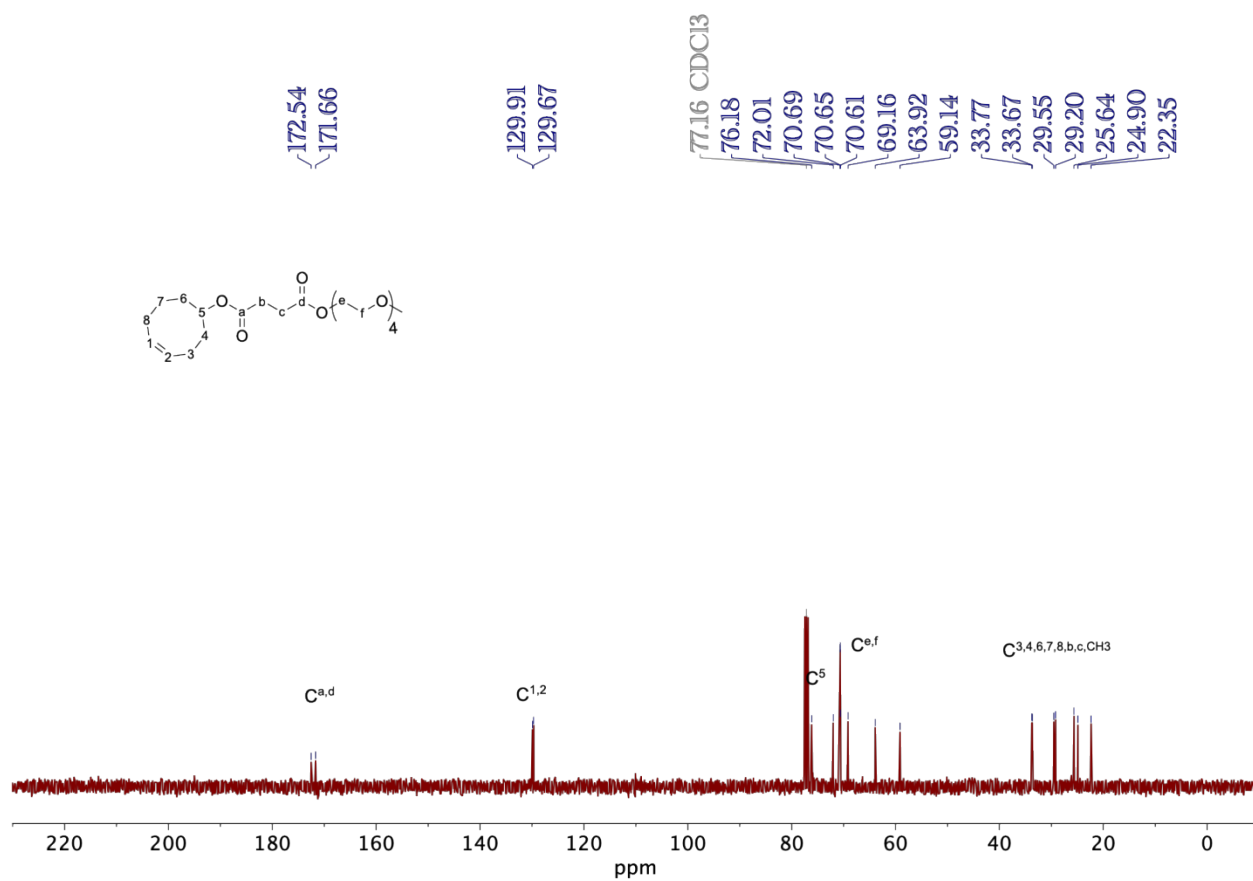

Figure S8  $^{13}\text{C}$  NMR spectrum of (Z)-cyclooct-4-en-1-yl (2,5,8,11-tetraoxatridecan-13-yl) succinate (CO3)

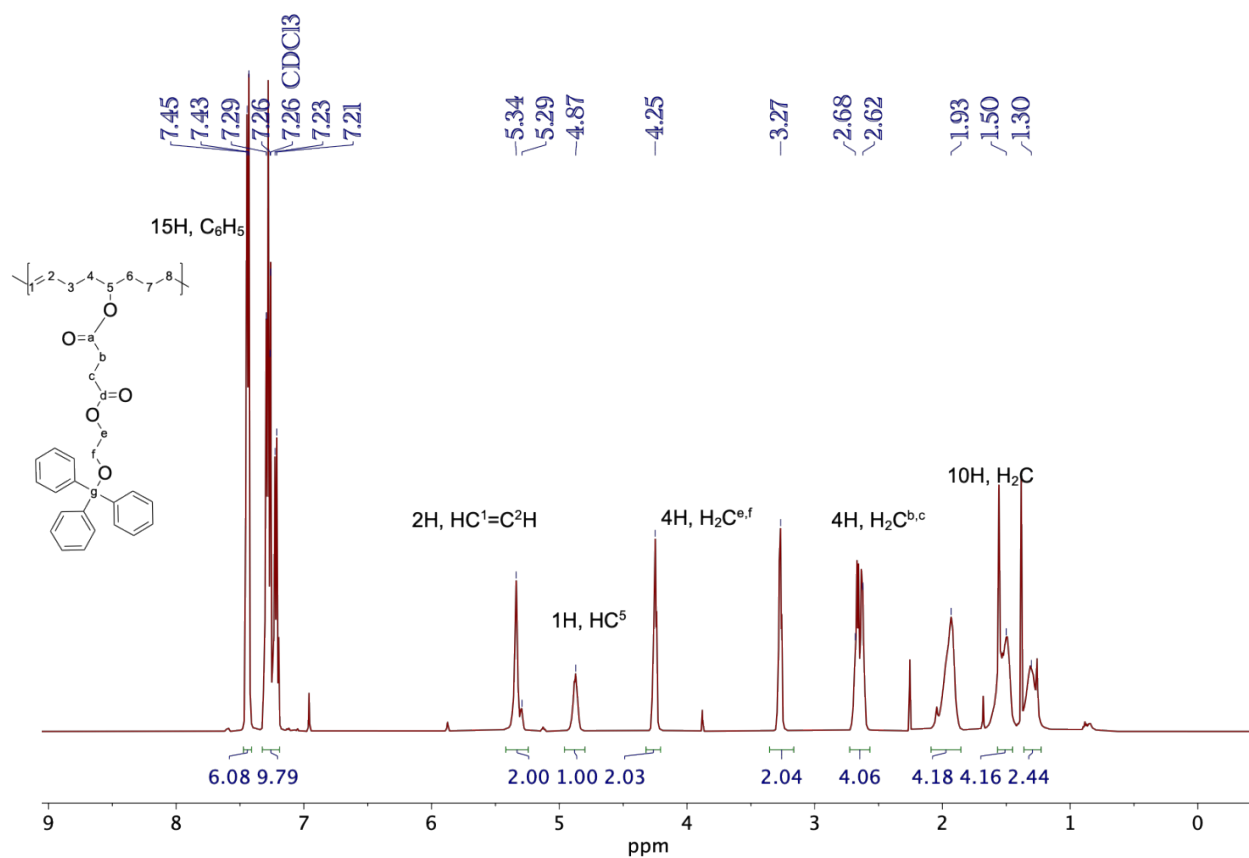

Figure S9  $^1\text{H}$  NMR spectrum of PCO1

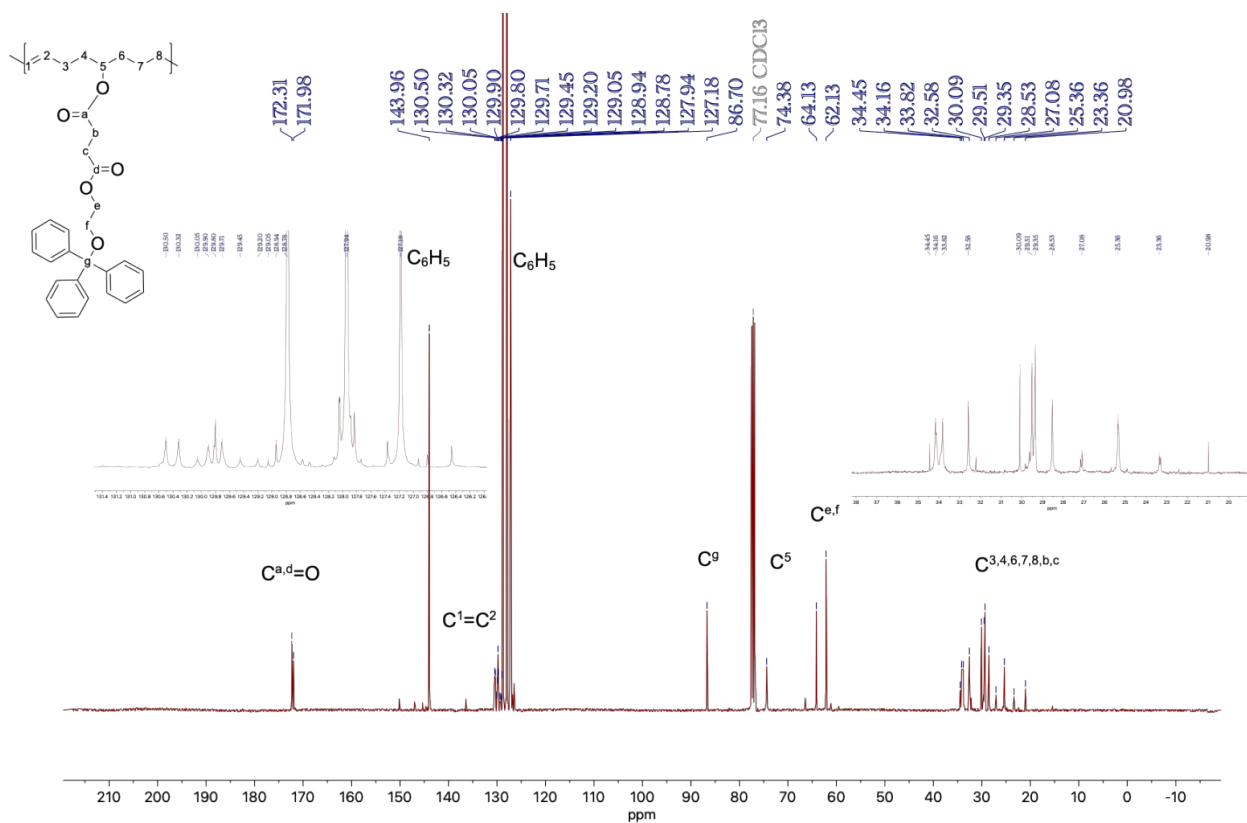

Figure S10 <sup>13</sup>C NMR spectrum of PCO1

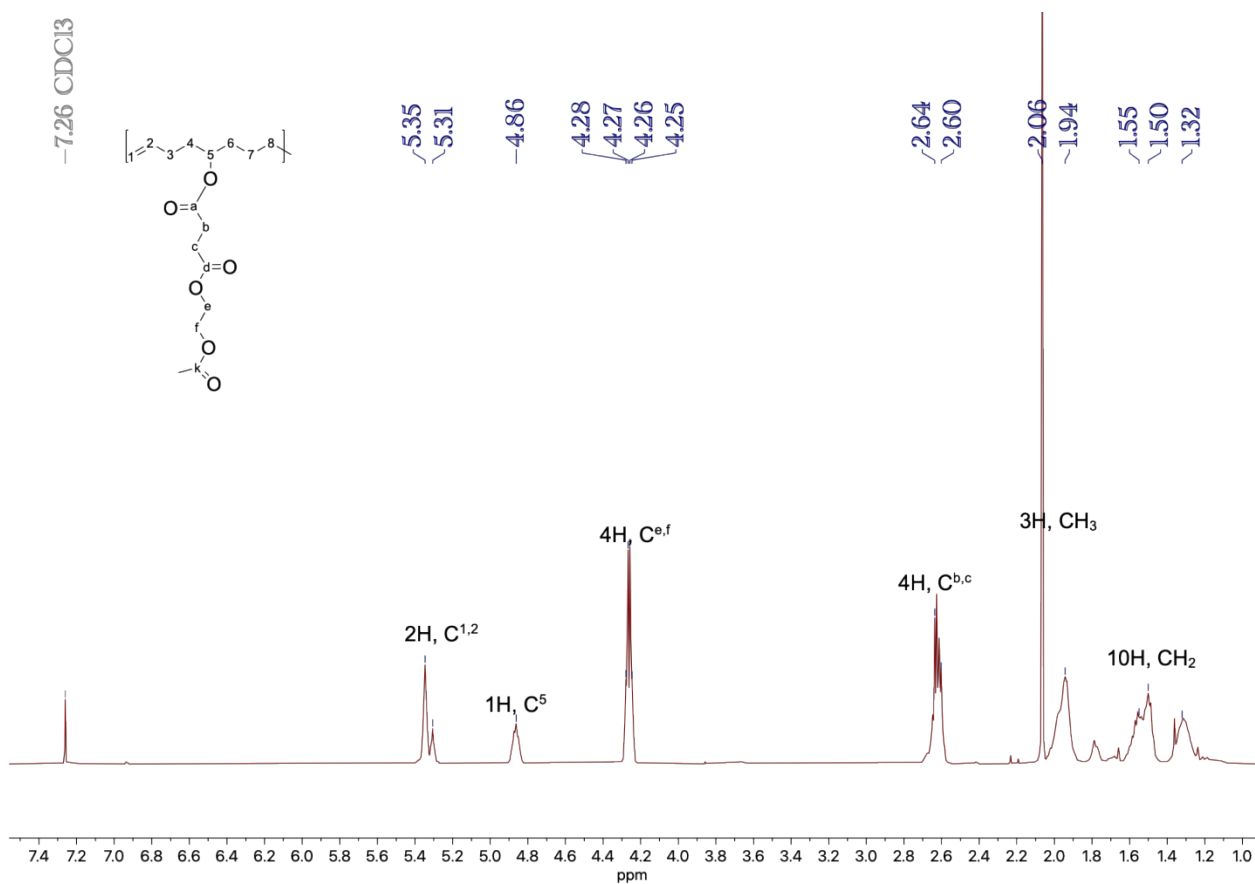

Figure S11 <sup>1</sup>H NMR spectrum of PCO2

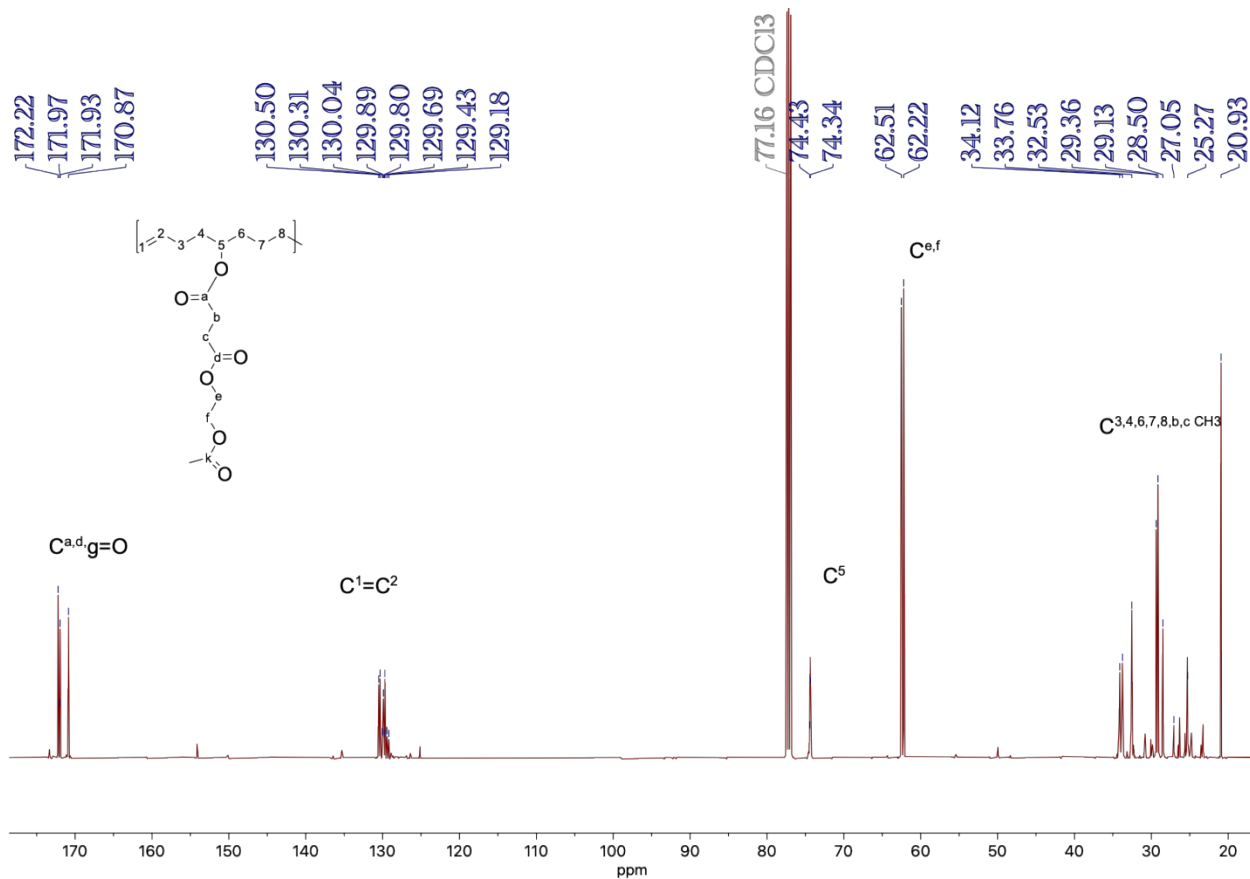

Figure S12  $^{13}\text{C}$  NMR spectrum of PCO2

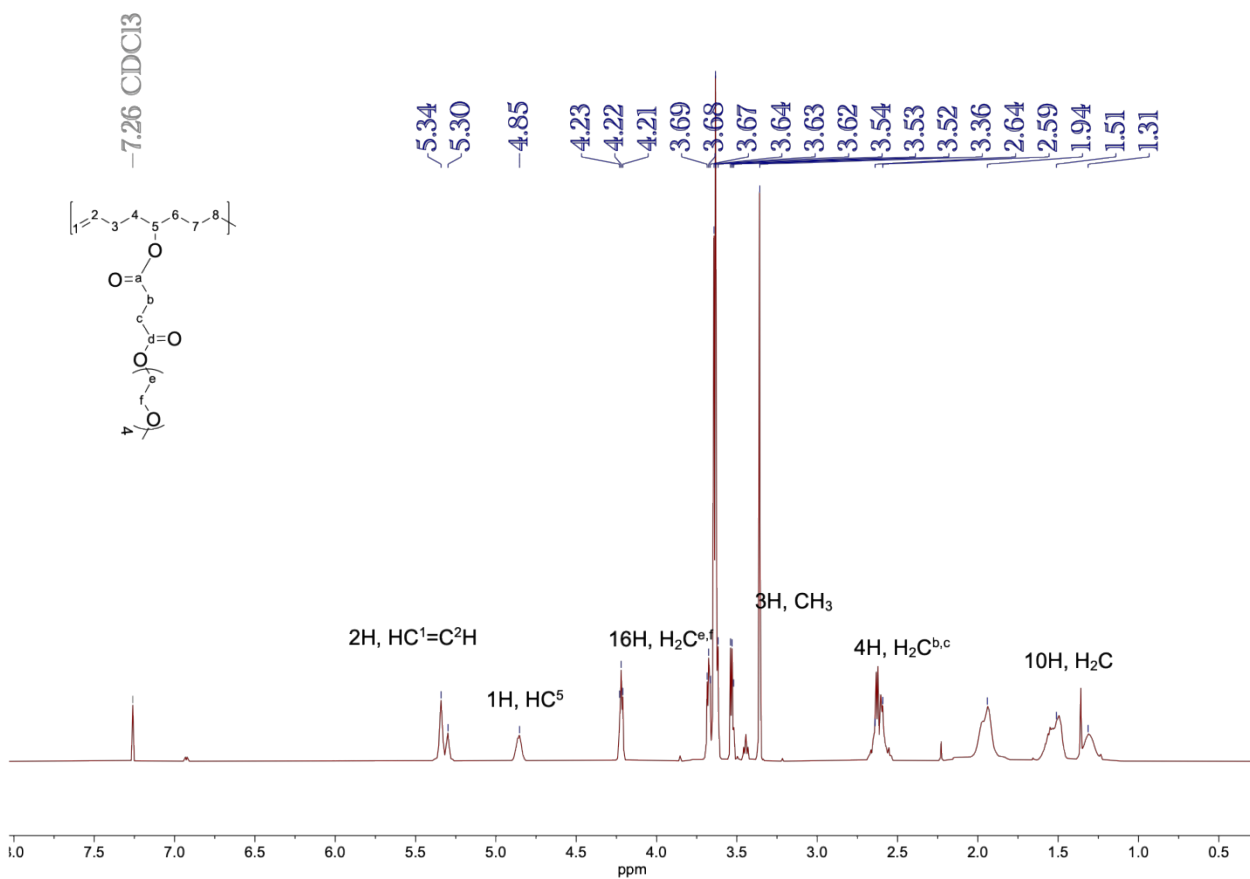

Figure S13  $^1\text{H}$  NMR spectrum of PCO3

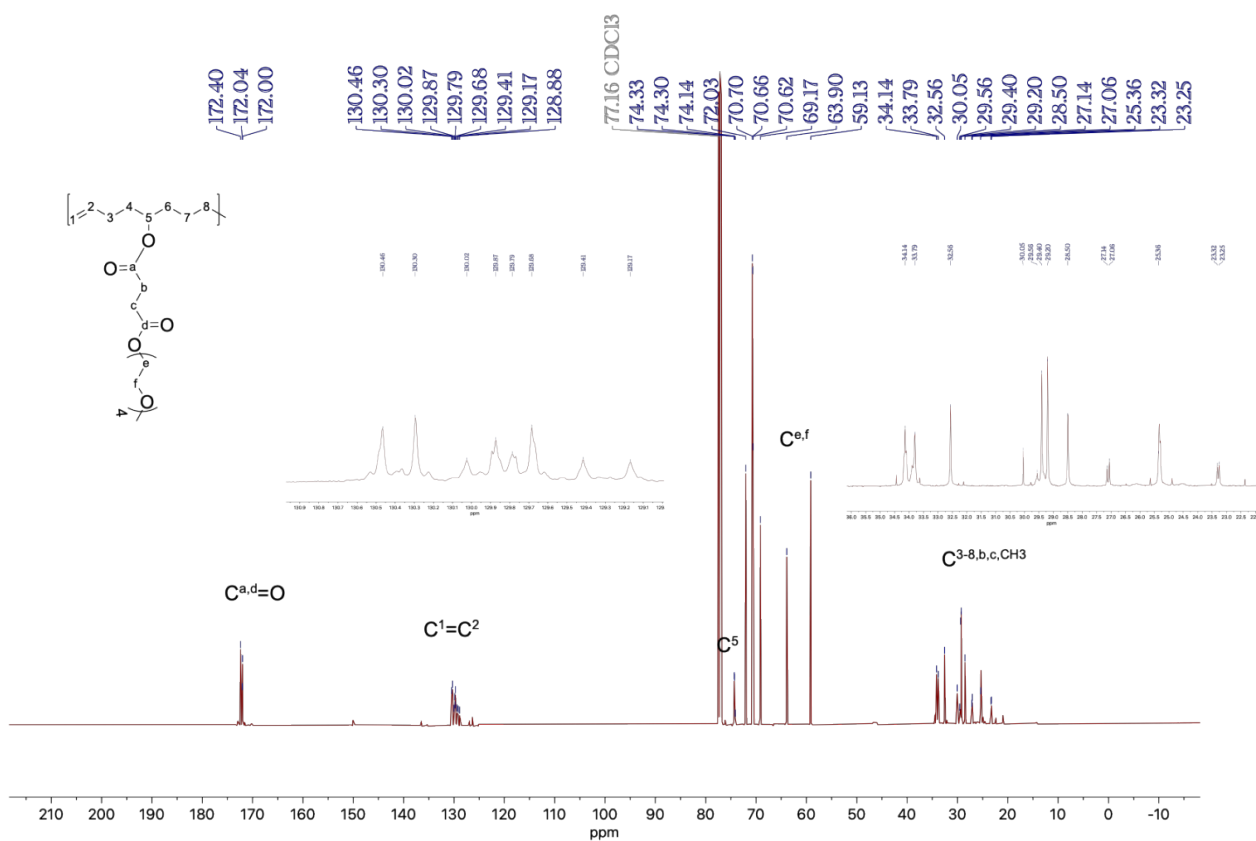

Figure S14  $^{13}\text{C}$  NMR spectrum of PCO3

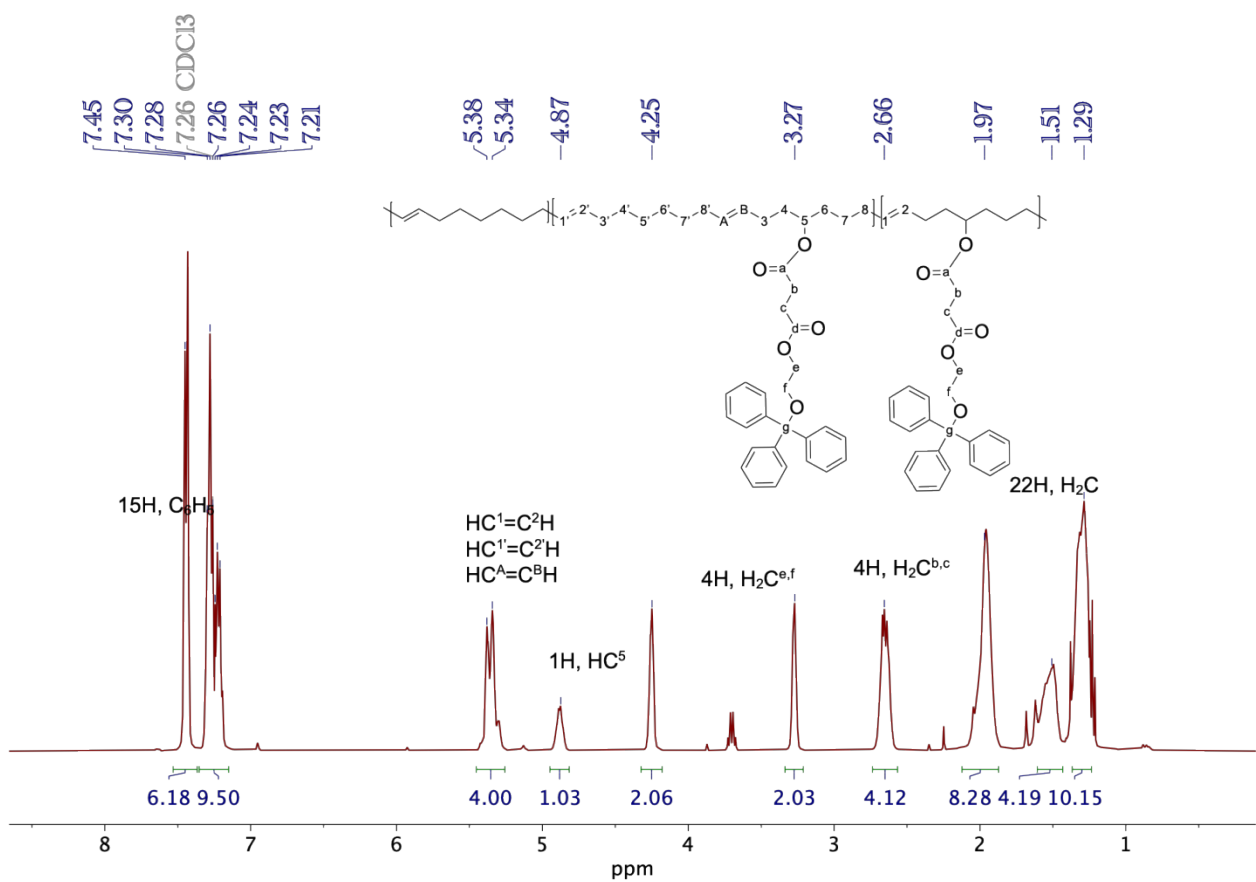

Figure S15  $^1\text{H}$  NMR spectrum of P(CO-CO1) copolymer



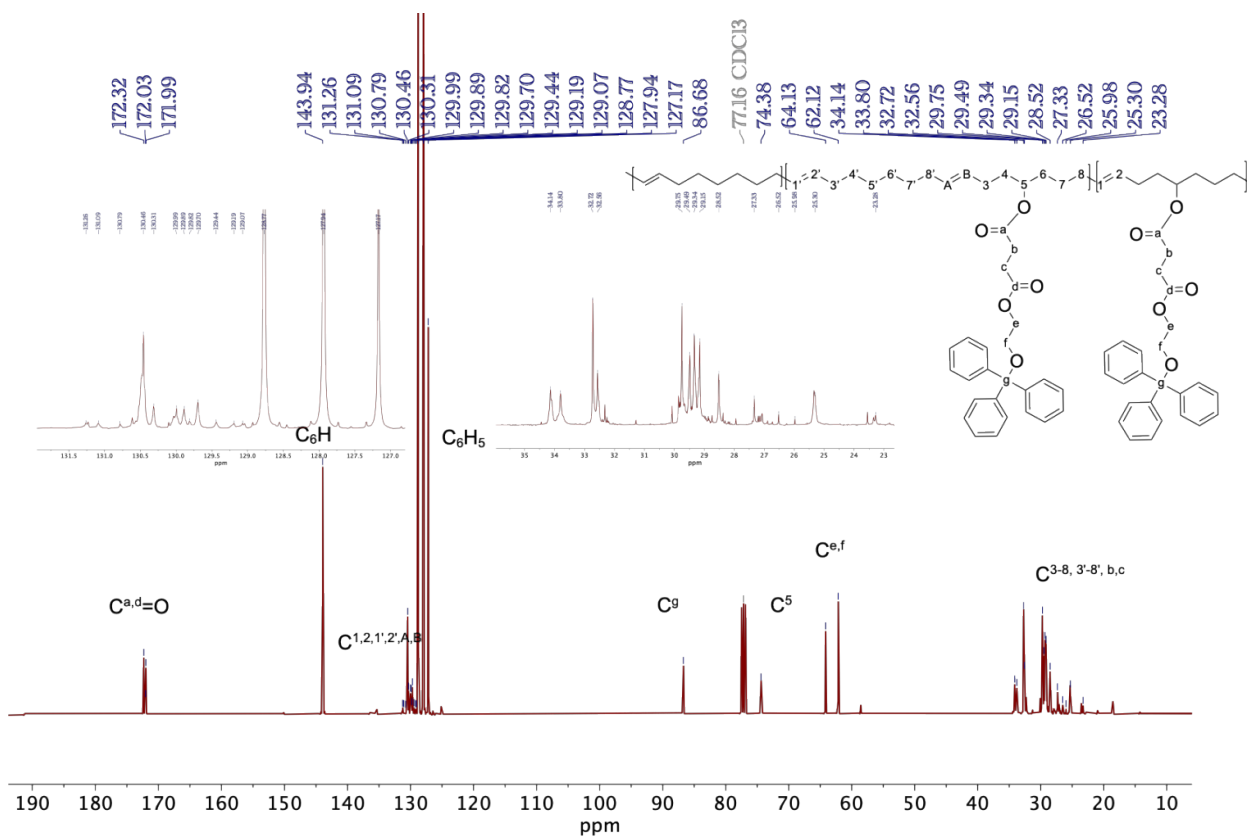

Figure S16  $^{13}\text{C}$  NMR spectrum of P(CO-CO1) copolymer

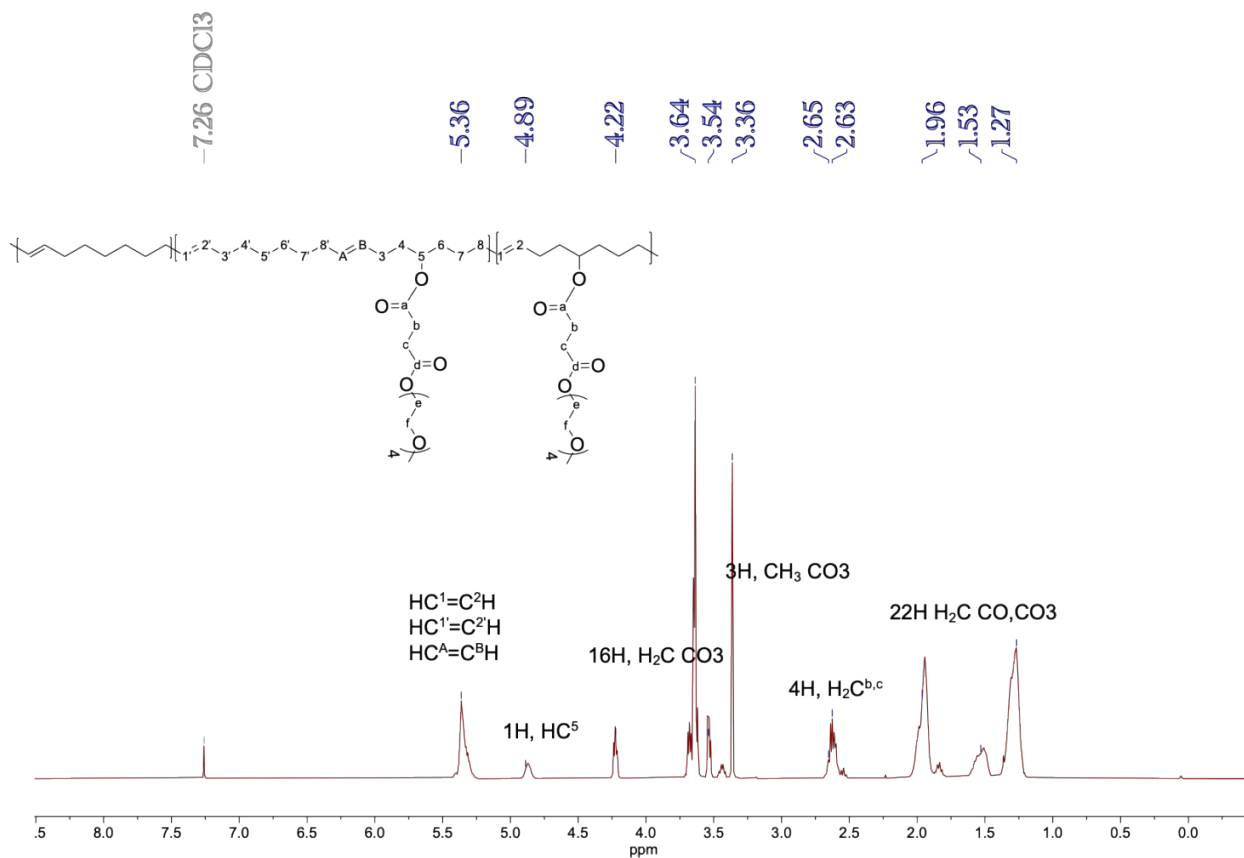

Figure S17  $^1\text{H}$  NMR spectrum of P(CO-CO3) copolymer

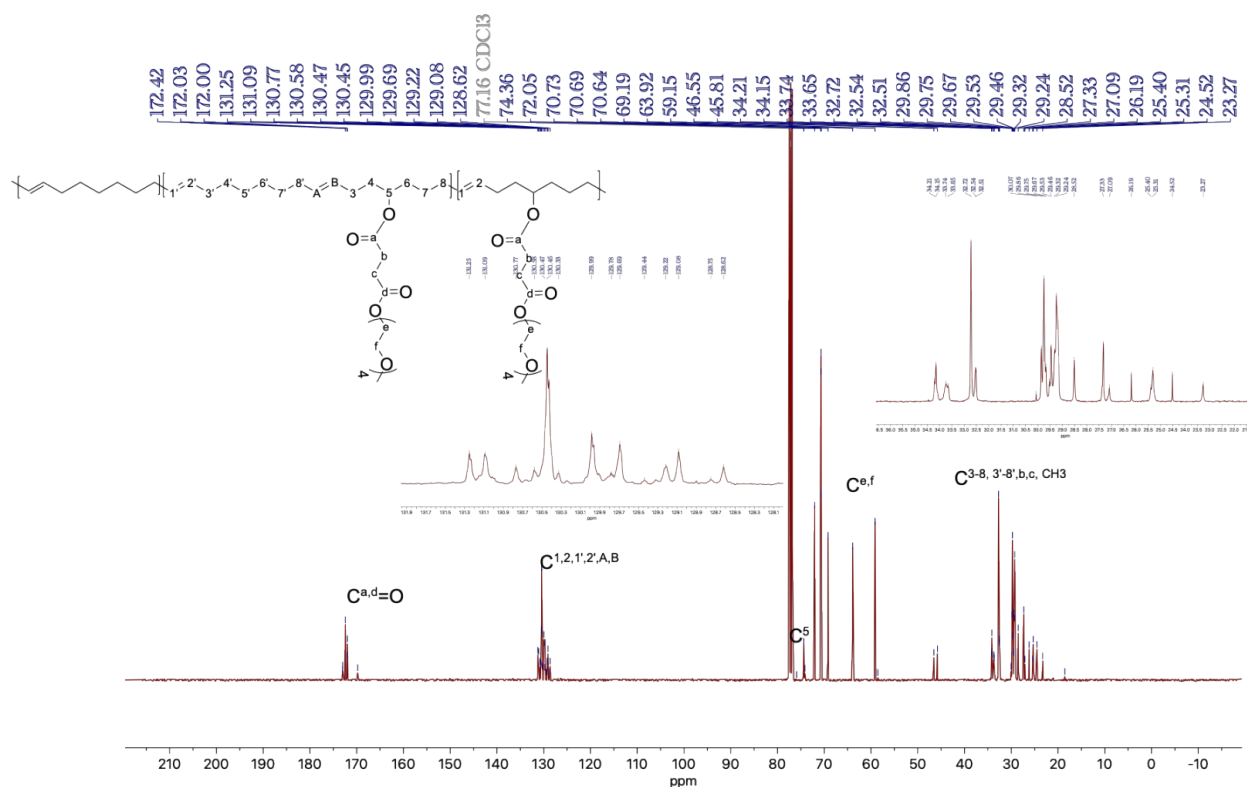

Figure S18 <sup>13</sup>C NMR spectrum of P(CO–CO<sub>3</sub>) copolymer

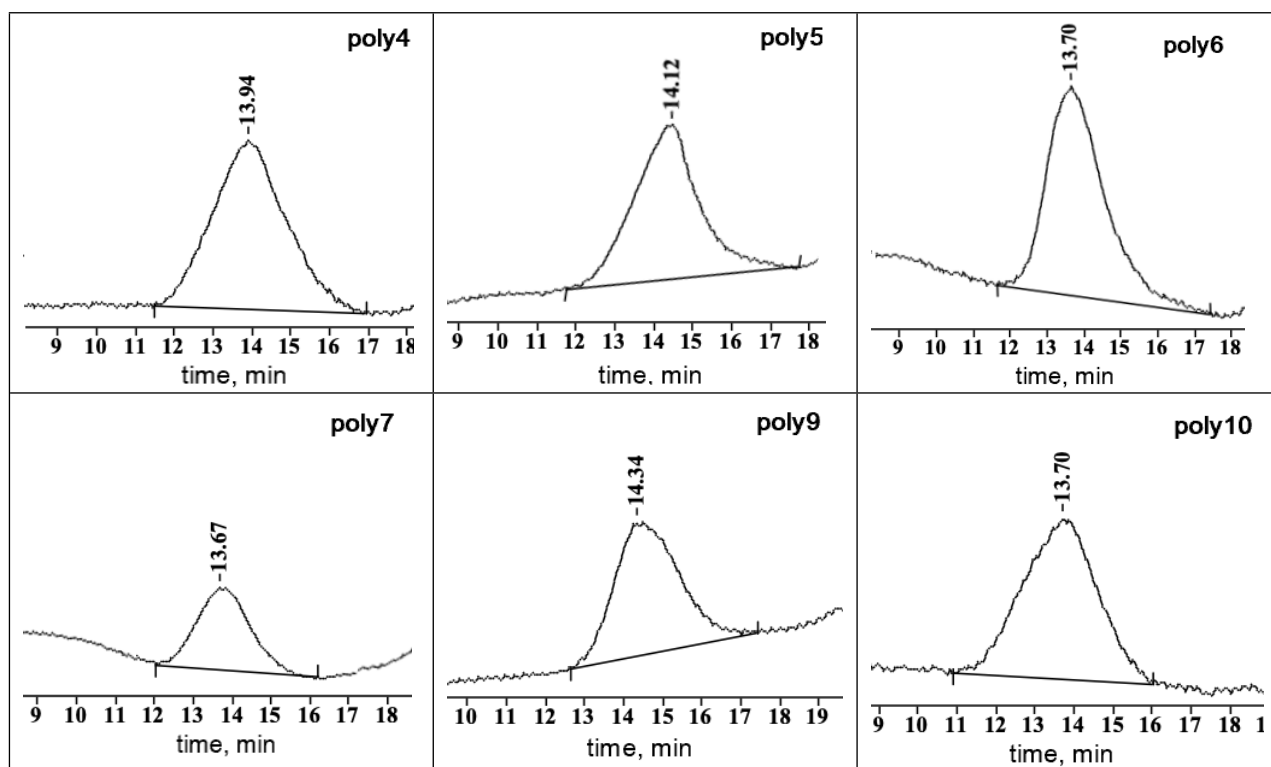

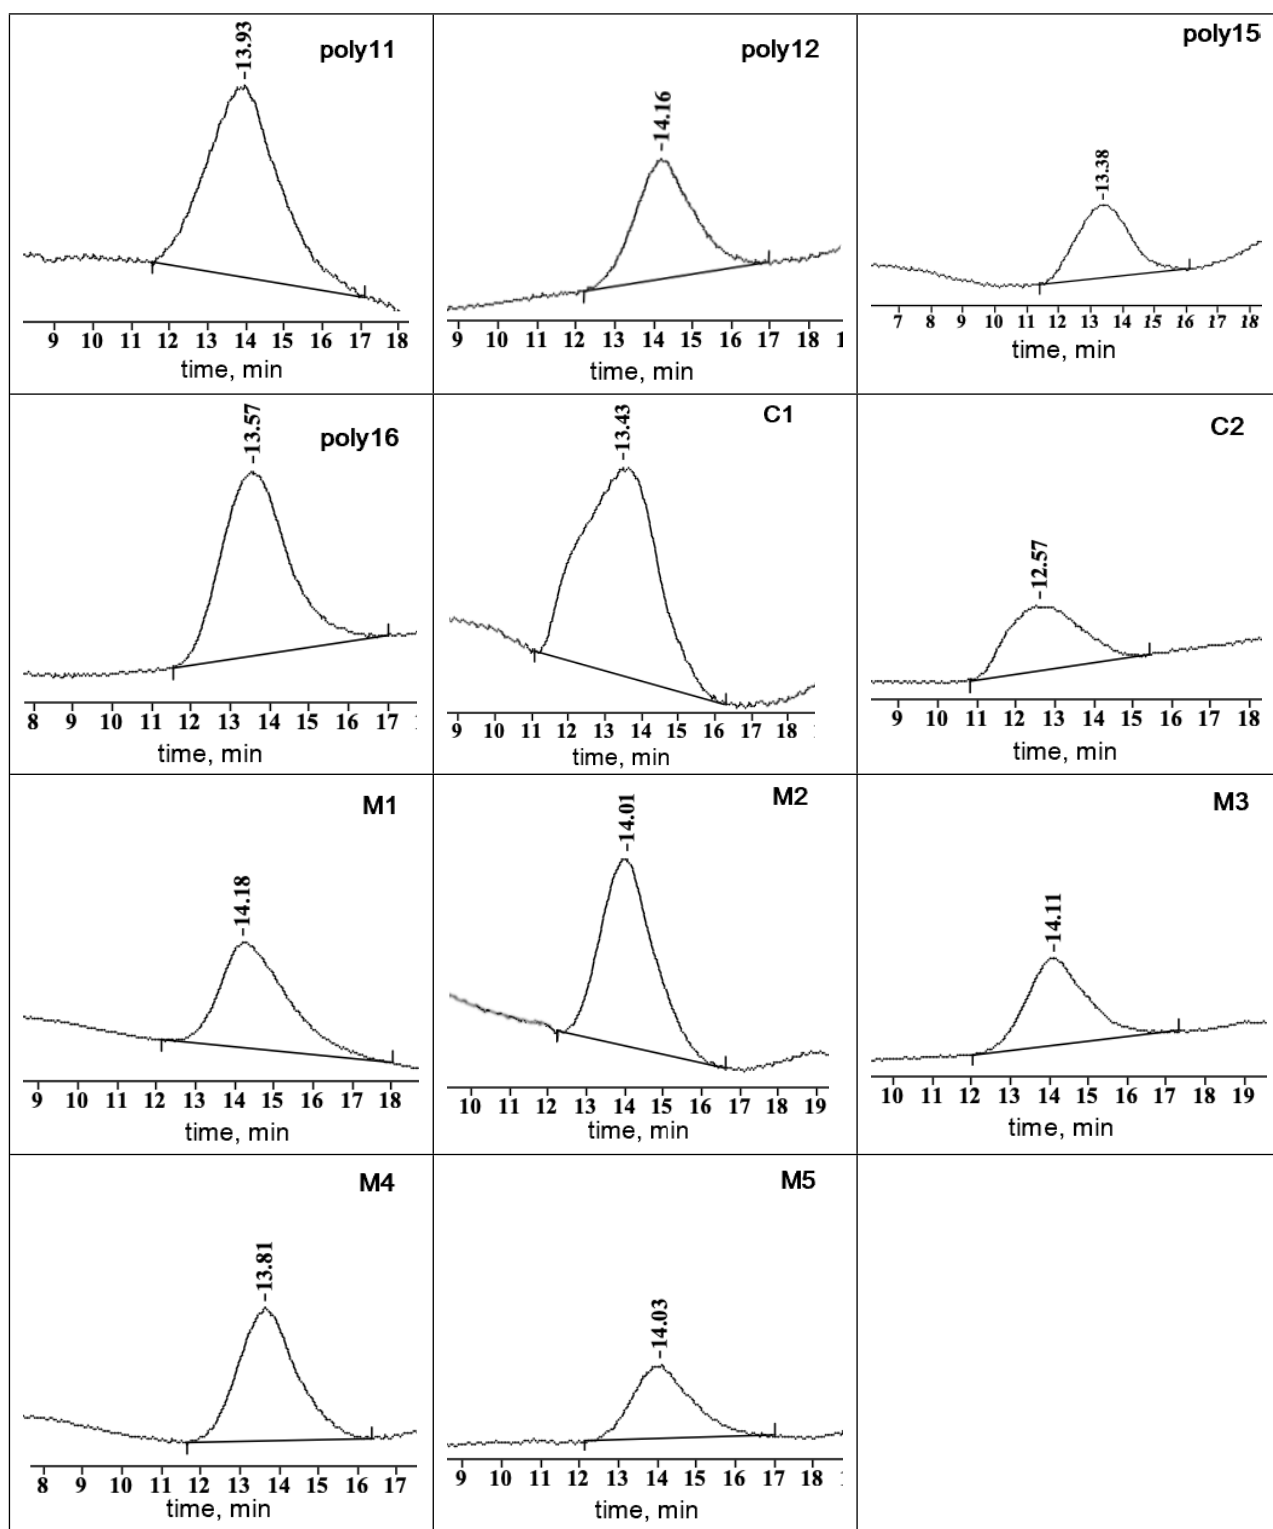

Figure S19 GPC traces of the homopolymers from Table 1 and copolymers from Table 2 of the main text

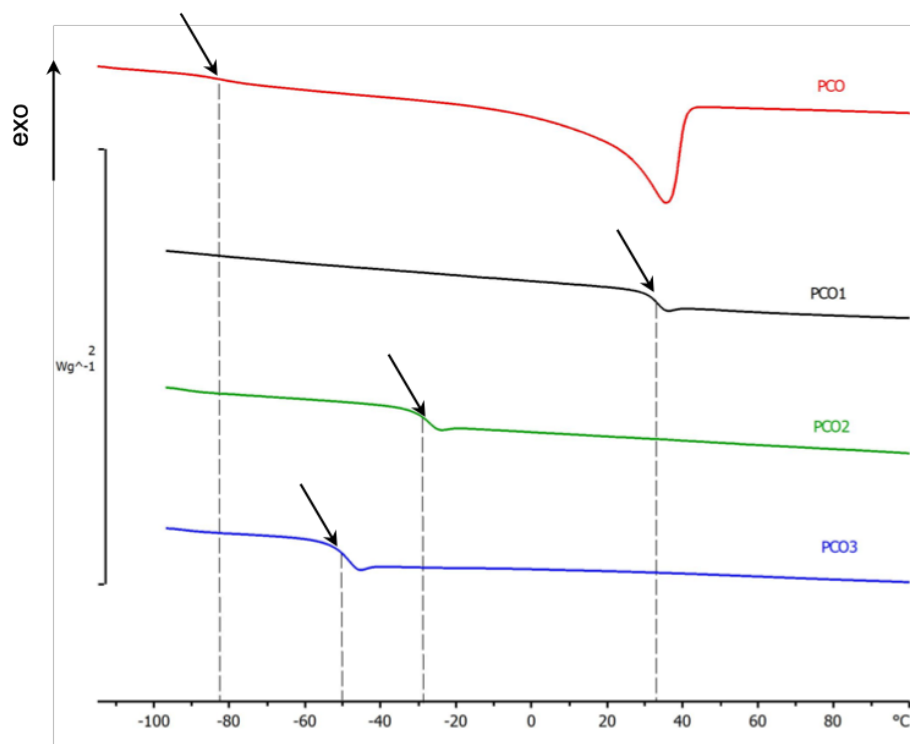

Figure S20 2<sup>nd</sup> heating DSC thermograms of homopolymers PCO, PCO1, PCO2, and PCO3

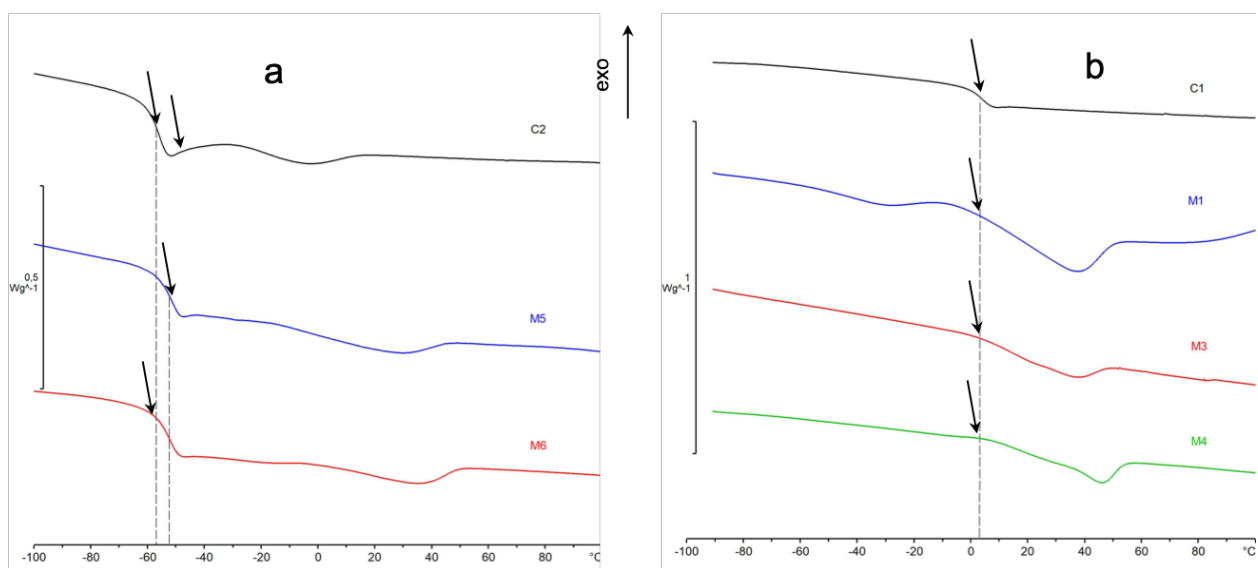

Figure S21 2<sup>nd</sup> heating DSC thermograms of (a) P(CO-CO1) and (b) P(CO-CO3) copolymers

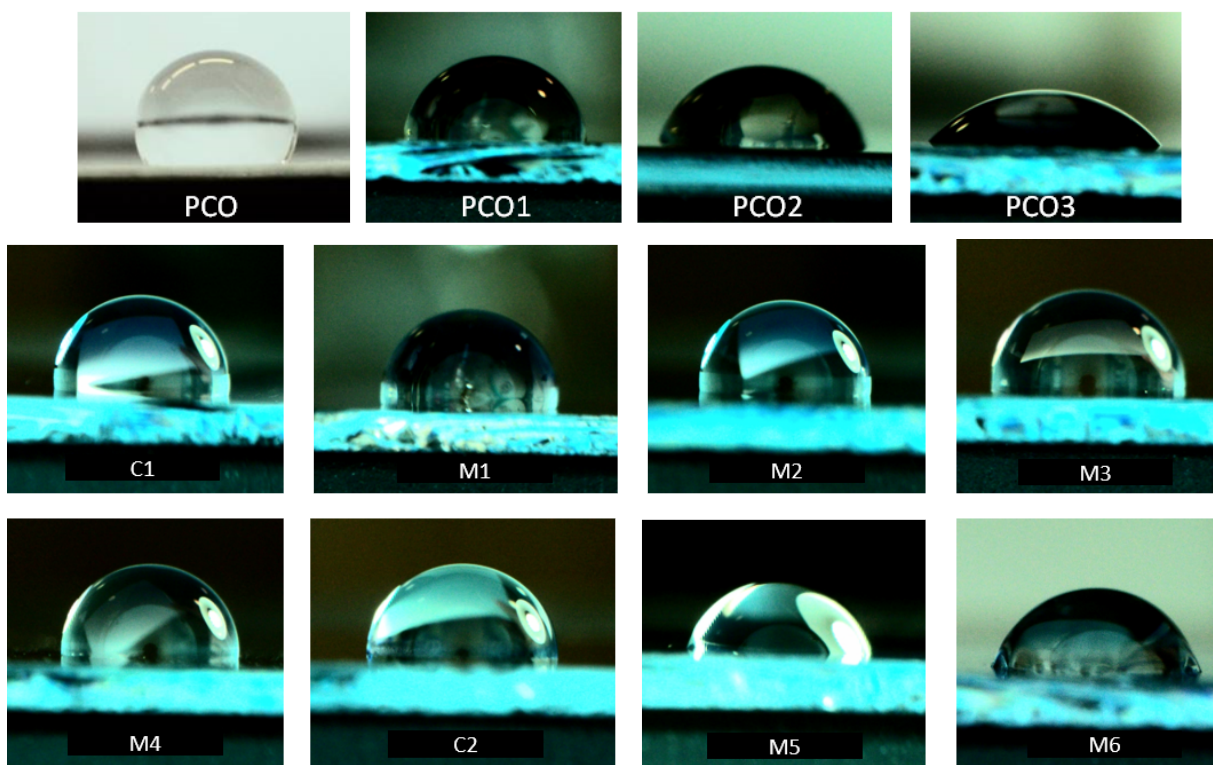

Figure S22 Water contact angle images of the homopolymers and copolymers from Table 3 of the main text

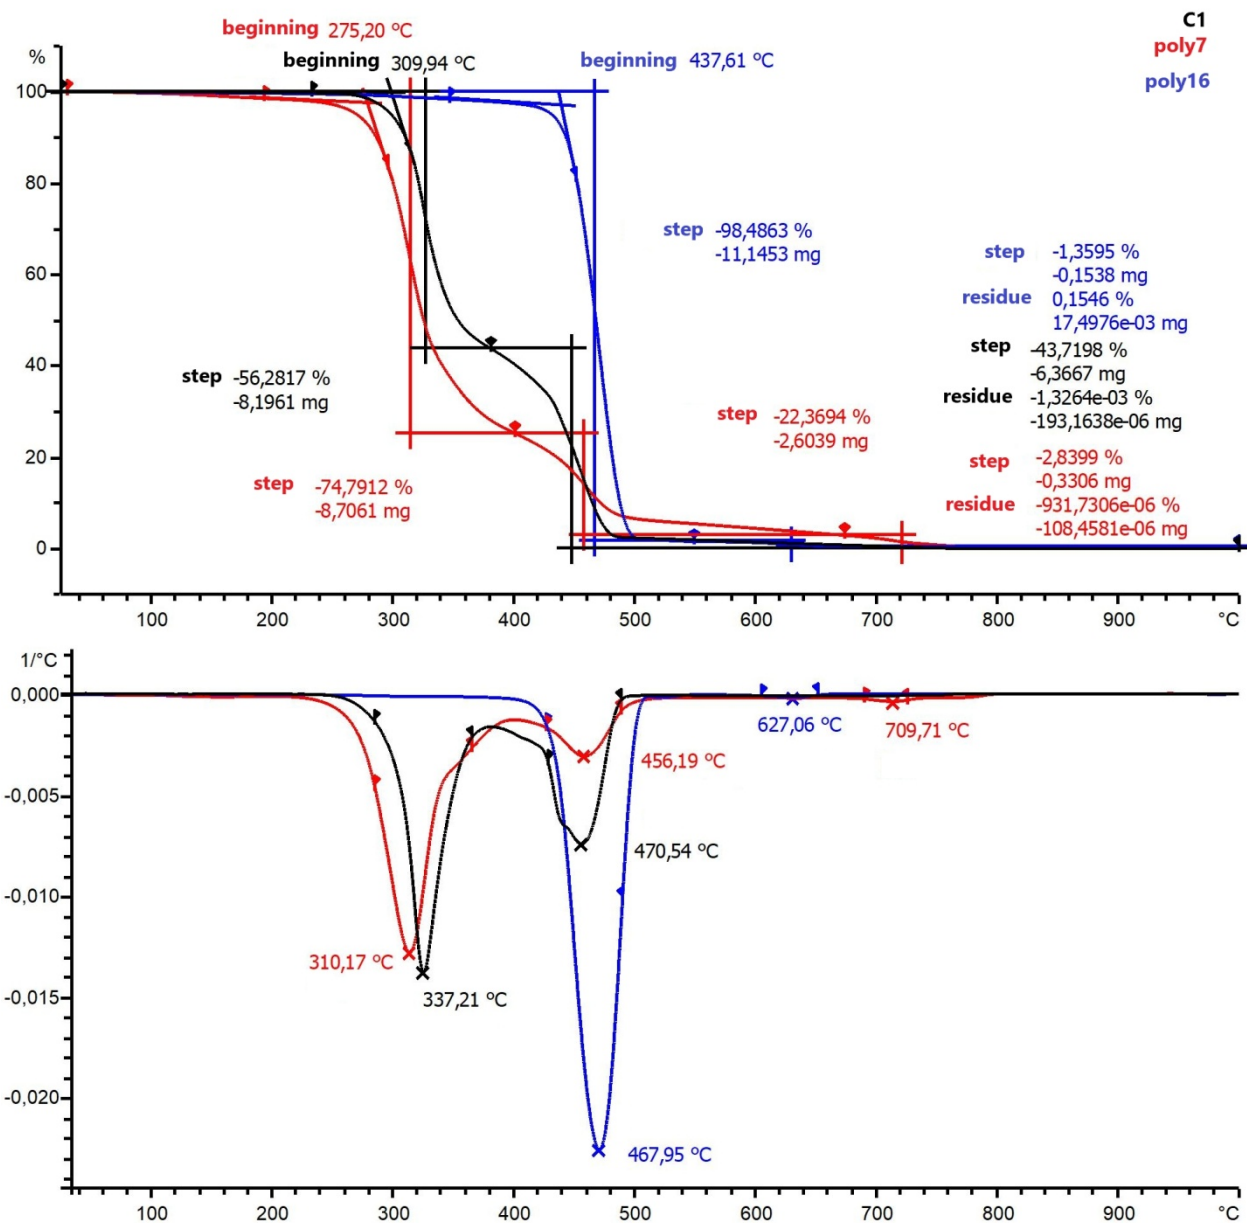

Figure S23 DTGA curves demonstrating (top) mass loss and (bottom) differential mass loss of PCO (sample 16 in Table 1), PCO1 (sample 7 in Table 1) and P(CO-CO1) copolymer (sample C1 in Table 2).

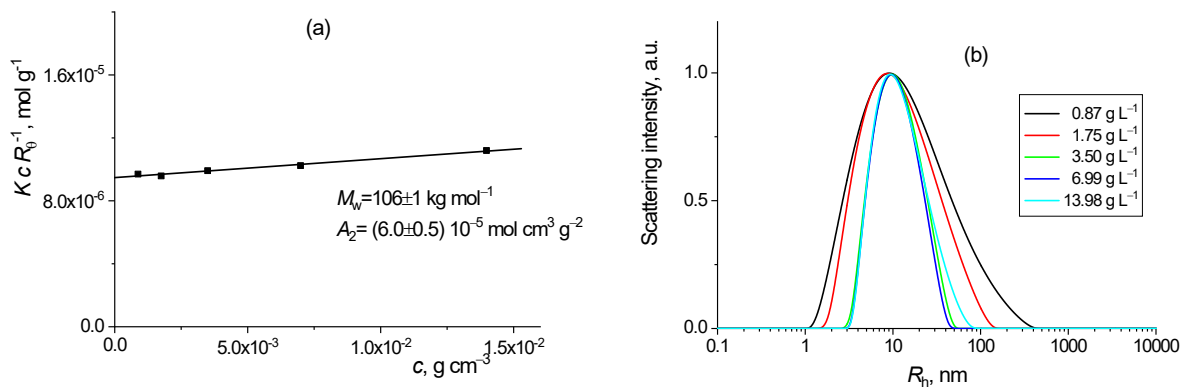

Figure S24 (a) Debye plot and (b) hydrodynamic radii ( $R_h$ ) distributions for PCO1 in ethyl acetate measured by SLS and DLS, respectively

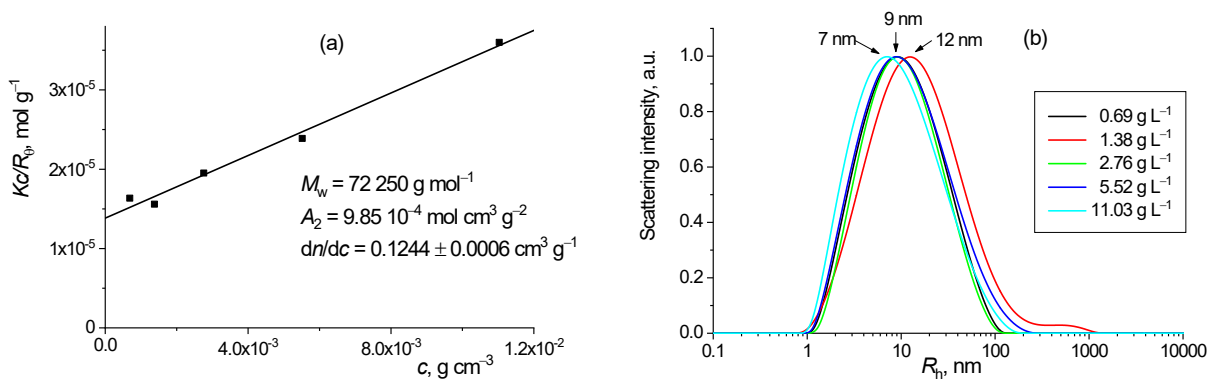

Figure S25 (a) Debye plot and (b) hydrodynamic radii ( $R_h$ ) distributions for PCO1 in chloroform measured by SLS and DLS, respectively

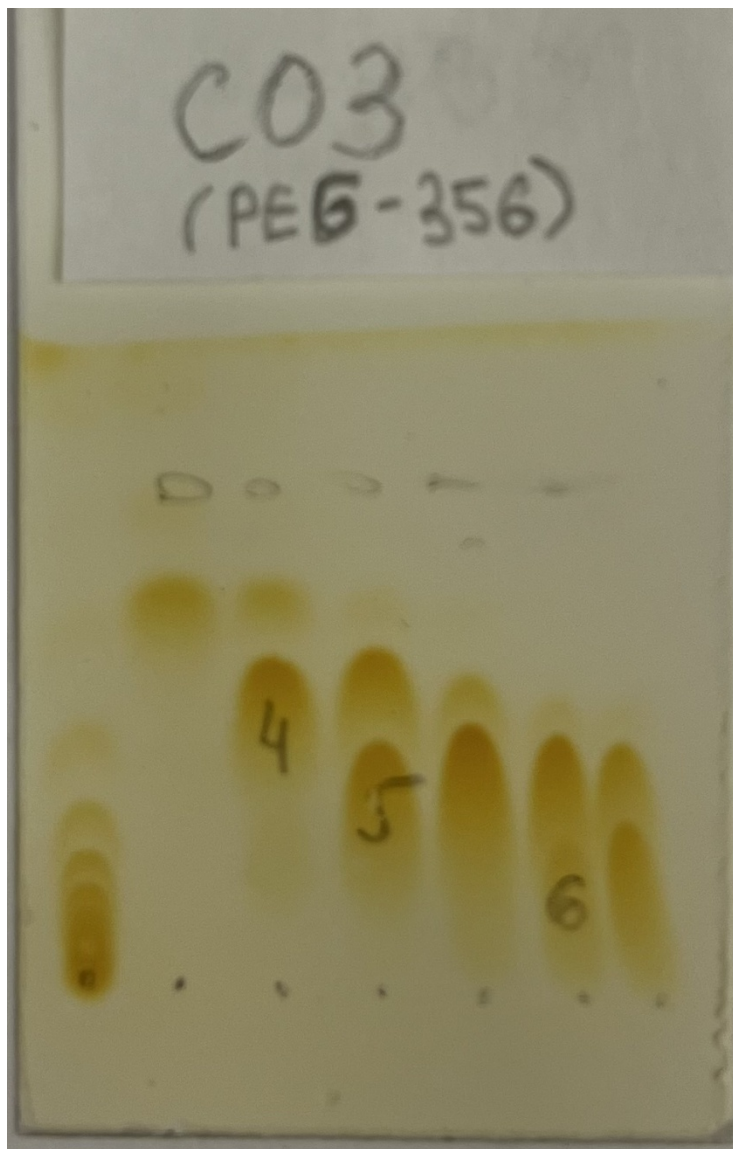

Figure S26 Thin-layer chromatography spots of CO3 (PEG356) fractionated on a chromatography column
